# Supplementary material for: Molecular Theory of Detonation Initiation: Insight from First Principles Modeling of the Decomposition Mechanisms of Organic Nitro Energetic Materials
Source: PubMed Central journal article supplement (PMC6273078; doi:10.3390/molecules21020236), 2016-02-19
Supplement: molecules-21-00236-s001.pdf [file molecules-21-00236-s001.pdf]

# Supplementary Materials: Molecular Theory of Detonation Initiation: Insight from First Principles Modeling of the Decomposition Mechanisms of Organic Nitro Energetic Materials

Roman V. Tsyshevsky, Onise Sharia and Maija M. Kuklja

## 1. Modeling DADNE

In simulating an ideal DADNE crystal, we used  $2 \times 2 \times 2$  Monkhorst-Pack k-point mesh and the kinetic energy cut-off was set to 520 eV. Atomic coordinates and lattice constants were allowed to simultaneously relax without any symmetry constraints. The convergence criterion for electronic steps was set to  $10^{-5}$  eV, and the maximum force acting on any atom was set not to exceed 0.02 eV/Å. The calculated lattice constants,  $a = 7.11$  Å,  $b = 6.83$  Å  $c = 11.558$  Å, were found to be in agreement with the experimental lattice constants  $a = 6.941$  Å,  $b = 6.569$  Å and  $c = 11.56$  Å [116] within 4%.

Surface reactions were simulated in a slab model, in which the supercell with lattice consisted of the four-molecule-thick surface layer (appropriately cut out to create the (010) surface) on top of a 10 Å of vacuum. Surface supercell calculations we performed at the Gamma point only, with kinetic energy cut-off set to 520 eV. The convergence criteria for electronic and ionic steps were set to  $10^{-5}$  eV and 0.03 Å/eV, respectively. Supercell has lattice parameters  $a = 14.220$  Å,  $b = 22.429$  Å and  $c = 23.119$  Å and contains 32 molecules. Coordinates of unit cell and surface supercell are collected below.

## 2. Modeling TATB

In simulating an ideal TATB crystal, we used  $2 \times 2 \times 3$  Monkhorst-Pack k-point mesh and the kinetic energy cut-off was set to 520 eV. Atomic coordinates and lattice constants were allowed to simultaneously relax without any symmetry constraints. The convergence criterion for electronic steps was set to  $10^{-5}$  eV, and the maximum force acting on any atom was set not to exceed 0.02 eV/Å. The calculated lattice constants,  $a = 9.207$  Å,  $b = 9.232$  Å  $c = 7.163$  Å, were found to be in agreement with the experimental lattice constants  $a = 9.010$  Å,  $b = 9.028$  Å and  $c = 6.812$  Å [1] within 5%.

Surface reactions were simulated in a slab model, in which the supercell with lattice consisted of the four-molecule-thick surface layer (appropriately cut out to create the (001) surface) on top of a 10 Å of vacuum. Surface supercell calculations we performed at the Gamma point only, with kinetic energy cut-off set to 520 eV. The convergence criteria for electronic and ionic steps were set to  $10^{-5}$  eV and 0.03 Å/eV, respectively. Supercell has lattice parameters  $a = 18.433$  Å,  $b = 15.971$  Å and  $c = 20.176$  Å and contains 16 molecules. Coordinates of unit cell and surface supercell are collected below.

## 3. Coordinates

### 3.1. DADNE unit cell

1.0

|                     |                     |                     |    |
|---------------------|---------------------|---------------------|----|
| 7.1101876328689233  | -0.0005603435561343 | -0.0486170540142459 |    |
| -0.0005365011028712 | 6.8334751457089720  | 0.0000845972268726  |    |
| -0.2032549274931936 | 0.0001876858325154  | 11.5579975699804454 |    |
| H                   | C                   | N                   | O  |
| 16                  | 8                   | 16                  | 16 |

Direct

|                    |                    |                    |
|--------------------|--------------------|--------------------|
| 0.7463286176948524 | 0.3322607512022090 | 0.3578620824202476 |
| 0.9452780760099621 | 0.2946062035375151 | 0.4500150617998909 |
| 0.4530670804250810 | 0.2940101277832702 | 0.4248557655810541 |

0.4174665741384880 0.2020352600710774 0.5650886174963731  
0.7536751555801490 0.8322724908668696 0.1421381493282493  
0.5547239859062347 0.7946278975967039 0.0499831543573485  
0.0469225107147145 0.7940074575140387 0.0751487501000364  
0.0824965217975275 0.7020290936136936 0.9349232076325854  
0.2536713823051479 0.6677392487977907 0.6421379175797526  
0.0547219239900380 0.7053937964624847 0.5499849382001094  
0.5469329195749194 0.7059898722167303 0.5751442344189456  
0.5825334258615122 0.7979647399289225 0.4349113825036275  
0.2463248444198511 0.1677275091331306 0.8578618506717508  
0.4452760140937654 0.2053721024032957 0.9500168456426521  
0.9530774892852854 0.2059925424859541 0.9248512498999564  
0.9175034782024726 0.2979709063863067 0.0650767923674217  
0.6917560763008982 0.2443409428759436 0.5225325000404096  
0.7704256623607451 0.1888816289454133 0.6361348957926580  
0.8082315415710665 0.7443412315979270 0.9774625156764805  
0.7295400322744265 0.6888913690416713 0.8638801656772148  
0.3082439236991017 0.7556590571240565 0.4774674999595978  
0.2295743376392549 0.8111183710545865 0.3638651042073419  
0.1917684584289332 0.2556587684020733 0.0225374843235191  
0.2704599677255735 0.3111086309583283 0.1361198343227852  
0.8031563185551199 0.2930673956200472 0.4365420296709465  
0.5060514642234891 0.2536694322951756 0.5042833030097399  
0.9650932742513625 0.1676970137231310 0.6586590401303306  
0.6491807397496517 0.1564527246410012 0.7300191060749780  
0.6968186873244014 0.7930819347678737 0.0634658605891840  
0.9939356992270466 0.7536715880303883 0.9957272759620465  
0.5348568332039043 0.6676940275822685 0.8413440571517474  
0.8507969912304956 0.6564562408540047 0.7699805484538806  
0.1968436814448800 0.7069326043799525 0.5634579703290534  
0.4939485357765109 0.7463305677048243 0.4957166969902604  
0.0349067257486377 0.8323029862768695 0.3413409598696690  
0.3508192602503487 0.8435472753589991 0.2699808939250217  
0.3031813126755989 0.2069180652321257 0.9365341394108159  
0.0060643007729534 0.2463284119696118 0.0042727240379538  
0.4651431667960961 0.3323059724177312 0.1586559428482600  
0.1492030087695037 0.3435437591459952 0.2300194515461194  
0.0233187209848485 0.0905683727525736 0.7515802142606762  
0.0784360570544222 0.2186632859642228 0.5819055228271341  
0.7028824929116996 0.1929790542203638 0.8317862067187910  
0.4851680139801969 0.0951120514277908 0.7084389115704258  
0.4766251473171835 0.5905596279324418 0.7484361152137051  
0.4215499716445278 0.7186649460478047 0.9180935483840033  
0.7970756790144982 0.6929802252672498 0.6682155069357761  
0.0147654072193283 0.5951435753380045 0.7915643079607619  
0.9766812790151517 0.9094316272474264 0.2484197857393239  
0.9215639429455778 0.7813367140357771 0.4180944771728661  
0.2971175070882998 0.8070209457796360 0.1682137932812095  
0.5148319860198031 0.9048879485722163 0.2915610884295747  
0.5233748526828160 0.4094403720675583 0.2515638847862947  
0.5784500283554720 0.2813350539521955 0.0819064516159966  
0.2029243209855017 0.3070197747327502 0.3317844930642233

0.9852345927806719 0.4048564246619959 0.2084356920392379

### 3.2. DADNE (010) surface

1.0

14.2207002639999995 0.0000000000000000 0.0000000000000000  
0.0000000000000000 22.4291992188000009 0.0000000000000000  
-0.5645396563000000 0.0000000000000000 23.1127067394999983

H C N O

128 64 128 128

Direct

0.3731145836938200 0.0565531168162792 0.1775109354949851  
0.3731145836747846 0.0565531168162792 0.6775109205789523  
0.8731145836938200 0.0565531168162792 0.1775109354949851  
0.8731145836747846 0.0565531168162792 0.6775109205789523  
0.3737942507643455 0.3807182857606092 0.1776382272492062  
0.3737942507615886 0.3807182857606092 0.6776382570271996  
0.8737942507643455 0.3807182857606092 0.1776382272492062  
0.8737942507615886 0.3807182857606092 0.6776382570271996  
0.4725684207883406 0.0474558204403232 0.2241764797369936  
0.4725684207975990 0.0474558204403232 0.7241764797045431  
0.9725683909726529 0.0474558204403232 0.2241764797369936  
0.9725683909819113 0.0474558204403232 0.7241764797045431  
0.4732128480062682 0.3700319549163523 0.2238397692162616  
0.4732128479889523 0.3700319549163523 0.7238397543434938  
0.9732128778219559 0.3700319549163523 0.2238397692162616  
0.9732128778046399 0.3700319549163523 0.7238397543434938  
0.2260552029891708 0.0426300738440759 0.2106906309319896  
0.2260552030001416 0.0426300738440759 0.7106906309428040  
0.7260552029891708 0.0426300738440759 0.2106906309319896  
0.7260552030001416 0.0426300738440759 0.7106906309428040  
0.2271588859944630 0.3703849686130615 0.2112075963021679  
0.2271588859934327 0.3703849686130615 0.7112076261234263  
0.7271588412709279 0.3703849686130615 0.2112075963021679  
0.7271588412698976 0.3703849686130615 0.7112076261234263  
0.2092320260670999 0.0148711564745850 0.2809913841609602  
0.2092320260197706 0.0148711564745850 0.7809913543613379  
0.7092320111592525 0.0148711564745850 0.2809913841609602  
0.709232011119232 0.0148711564745850 0.7809913543613379  
0.2088409232084336 0.3436890205299182 0.2816690674454674  
0.2088409232297002 0.3436890205299182 0.7816690376025801  
0.7088409083005863 0.3436890205299182 0.2816690674454674  
0.7088409083218600 0.3436890205299182 0.7816690376025801  
0.3765228674209800 0.2193021039292447 0.0724932184479883  
0.3765228673736508 0.2193021039292447 0.5724931886483589  
0.8765228376052925 0.2193021039292447 0.0724932184479883  
0.8765228375579632 0.2193021039292447 0.5724931886483589  
0.3758742194204110 0.5454850943808641 0.0725968567485830  
0.3758742193893674 0.5454850943808641 0.5725968716429869  
0.8758741896047235 0.5454850943808641 0.0725968567485830  
0.8758741896439952 0.5454850943808641 0.5725968716429869

0.2771891805699406 0.2088041063293285 0.0260959440690349  
0.2771891805544436 0.2088041063293285 0.5260959310134445  
0.7771891805699406 0.2088041063293285 0.0260959440690349  
0.7771891805544365 0.2088041063293285 0.5260959310134445  
0.2763934931728751 0.5350009746311624 0.0263764690125431  
0.2763934931453629 0.5350009746311624 0.5263764857673966  
0.7763934931728752 0.5350009746311624 0.0263764690125431  
0.7763934931453630 0.5350009746311624 0.5263764857673966  
0.5233272780472635 0.2083983174787505 0.0390657253723159  
0.5233272780494449 0.2083983174787505 0.5390657216189733  
0.0233273414056061 0.2083983174787505 0.0390657253723159  
0.0233273414077875 0.2083983174787505 0.5390657216189733  
0.5226664168891543 0.5361356010421517 0.0389530342869376  
0.5226664168718383 0.5361356010421517 0.5389530194141626  
0.0226664485331679 0.5361356010421517 0.0389530342869376  
0.0226664485158449 0.5361356010421517 0.5389530194141626  
0.5414568980007659 0.1820859565682446 0.4683791176515758  
0.5414568980117367 0.1820859565682446 0.9683791176623904  
0.0414569054546862 0.1820859565682446 0.4683791176515758  
0.0414569054656640 0.1820859565682446 0.9683791176623904  
0.5409774809184765 0.5087983251157784 0.4687244619654911  
0.5409774809157196 0.5087983251157784 0.9687244917434844  
0.0409774697375892 0.5087983251157784 0.4687244619654911  
0.0409774697348394 0.5087983251157784 0.9687244917434844  
0.1259342620165229 0.1739434180538823 0.3226736132710166  
0.1259342620154855 0.1739434180538823 0.8226736430922750  
0.6259342471086756 0.1739434180538823 0.3226736132710166  
0.6259342471076453 0.1739434180538823 0.8226736430922750  
0.1268634481722833 0.4973188845345549 0.3221192814228712  
0.1268634481935570 0.4973188845345549 0.8221192515799769  
0.6268634928958184 0.4973188845345549 0.3221192814228712  
0.6268634928467697 0.4973188845345549 0.8221192515799769  
0.0268017520100389 0.1849856945337695 0.2763009665708629  
0.0268017520330250 0.1849856945337695 0.7763009367712405  
0.5268017464547530 0.1849856945337695 0.2763009665708629  
0.5268017464074237 0.1849856945337695 0.7763009367712405  
0.0276128329120988 0.5068433878271692 0.2753002585971668  
0.0276128329350920 0.5068433878271692 0.7753002287975375  
0.5276128440929861 0.5068433878271692 0.2753002585971668  
0.5276128441159722 0.5068433878271692 0.7753002287975375  
0.2729075797349722 0.1835477838266662 0.2891205428767689  
0.2729075796739153 0.1835477838266662 0.7891205428443183  
0.7729075797349723 0.1835477838266662 0.2891205428767689  
0.7729075796739153 0.1835477838266662 0.7891205428443183  
0.2742642389968834 0.5111420345329062 0.2890608228661291  
0.2742642390198766 0.5111420345329062 0.7890607930665067  
0.7742642389968835 0.5111420345329062 0.2890608228661291  
0.7742642390198766 0.5111420345329062 0.7890607930665067  
0.2914355698705902 0.2096755131686552 0.2184909143260144  
0.2914355698815681 0.2096755131686552 0.7184909143368359  
0.7914355698705903 0.2096755131686552 0.2184909143260144  
0.7914355698815682 0.2096755131686552 0.7184909143368359

0.2911878330584288 0.5393349579535013 0.2189416724006933  
0.2911878330676871 0.5393349579535013 0.7189416723682428  
0.7911878032427340 0.5393349579535013 0.2189416724006933  
0.7911878032519923 0.5393349579535013 0.7189416723682428  
0.1247999332736069 0.0088202993495184 0.4272676331142267  
0.1247999332845848 0.0088202993495184 0.9272676331250482  
0.6247999332736069 0.0088202993495184 0.4272676331142267  
0.6247999332845848 0.0088202993495184 0.9272676331250482  
0.1229068987322532 0.3351965699049465 0.4274786677645232  
0.1229068986849239 0.3351965699049465 0.9274786379649008  
0.6229068614626454 0.3351965699049465 0.4274786677645232  
0.6229068614856315 0.3351965699049465 0.9274786379649008  
0.2239304486009770 0.0191665025770489 0.4738088747170429  
0.2239304486239702 0.0191665025770489 0.9738088449174205  
0.7239304038774420 0.0191665025770489 0.4738088747170429  
0.7239304039004352 0.0191665025770489 0.9738088449174205  
0.2223011079122085 0.3456346665126563 0.4738820597672725  
0.2223011079094516 0.3456346665126563 0.9738820895452587  
0.7223011079122086 0.3456346665126563 0.4738820597672725  
0.7223011079094517 0.3456346665126563 0.9738820895452587  
0.9777289865356823 0.0178926981149203 0.4608110426177308  
0.9777289865346449 0.0178926981149203 0.9608110724389891  
0.4777289865356822 0.0178926981149203 0.4608110426177308  
0.4777289865346449 0.0178926981149203 0.9608110724389891  
0.9760857141318211 0.3458171370201026 0.4610847692791091  
0.9760857141427990 0.3458171370201026 0.9610847692899236  
0.4760857141318211 0.3458171370201026 0.4610847692791091  
0.4760857141427990 0.3458171370201026 0.9610847692899236  
0.9590391367729841 0.0451736379702326 0.0309917733868750  
0.9590391368065857 0.0451736379702326 0.5309917491686014  
0.4590391069572893 0.0451736379702326 0.0309917733868750  
0.4590391069908909 0.0451736379702326 0.5309917491686014  
0.9579986700160504 0.3717683785355557 0.0318382373917900  
0.9579986699850068 0.3717683785355557 0.5318382522861940  
0.4579986700160506 0.3717683785355557 0.0318382373917900  
0.4579986699850070 0.3717683785355557 0.5318382522861940  
0.3459637545900496 0.0299545312290735 0.2599932452461822  
0.3459637546010275 0.0299545312290735 0.7599932452569966  
0.8459637844057445 0.0299545312290735 0.2599932452461822  
0.8459637844167224 0.0299545312290735 0.7599932452569966  
0.3461783066809924 0.3559164473720426 0.2604583447807925  
0.3461783066799550 0.3559164473720426 0.7604583746020509  
0.8461782768652976 0.3559164473720426 0.2604583447807925  
0.8461782768642673 0.3559164473720426 0.7604583746020509  
0.3852932483525189 0.0154369312461557 0.3172864906555122  
0.3852932483051896 0.0154369312461557 0.8172864608558899  
0.8852932780978843 0.0154369312461557 0.3172864906555122  
0.8852932781208774 0.0154369312461557 0.8172864608558899  
0.3852967665409908 0.3401958555561894 0.3175829179621146  
0.3852967664816463 0.3401958555561894 0.8175829179729289  
0.8852967367252961 0.3401958555561894 0.3175829179621146  
0.8852967367362740 0.3401958555561894 0.8175829179729289

0.4042616277820124 0.1943006699723774 0.4897150764947805  
0.4042616277912707 0.1943006699723774 0.9897150764623300  
0.9042615681506299 0.1943006699723774 0.4897150764947805  
0.9042615681598882 0.1943006699723774 0.9897150764623300  
0.4036970055652604 0.5209526710793880 0.4897085560188106  
0.4036970055745188 0.5209526710793880 0.9897085559863601  
0.9036969757495655 0.5209526710793880 0.4897085560188106  
0.9036969757588310 0.5209526710793880 0.9897085559863601  
0.3651183331543669 0.1789367481528719 0.4324571499338719  
0.3651183331773601 0.1789367481528719 0.9324571201342495  
0.8651183331543669 0.1789367481528719 0.4324571499338719  
0.8651183331773601 0.1789367481528719 0.9324571201342495  
0.3649364125761318 0.5045252808076475 0.4325833313276637  
0.3649364125733820 0.5045252808076475 0.9325833611056499  
0.8649364423918194 0.5045252808076475 0.4325833313276637  
0.8649364423890696 0.5045252808076475 0.9325833611056499  
0.1540184475558989 0.1982756937738809 0.2397780077487497  
0.1540184475531491 0.1982756937738809 0.7397780375267431  
0.6540184475558990 0.1982756937738809 0.2397780077487497  
0.6540184475531492 0.1982756937738809 0.7397780375267431  
0.1544379392907989 0.5242698437573944 0.2397851638116688  
0.1544379392314543 0.5242698437573944 0.7397851638224833  
0.6544379392907987 0.5242698437573944 0.2397851638116688  
0.6544379392314542 0.5242698437573944 0.7397851638224833  
0.1151023263260348 0.2138490588206871 0.1825750115752822  
0.1151023263370127 0.2138490588206871 0.6825750115861038  
0.6151023486878024 0.2138490588206871 0.1825750115752822  
0.6151023486987803 0.2138490588206871 0.6825750115861038  
0.1151808836011988 0.5391178632677182 0.1825423385337130  
0.1151808835838828 0.5391178632677182 0.6825423236609451  
0.6151808836011988 0.5391178632677182 0.1825423385337130  
0.6151808835838829 0.5391178632677182 0.6825423236609451  
0.0965322184027917 0.0329530146496448 0.0101873386190855  
0.0965322183590009 0.0329530146496448 0.5101873106799126  
0.5965322333106390 0.0329530146496448 0.0101873386190855  
0.5965322332668482 0.0329530146496448 0.5101873106799126  
0.0953133368531023 0.3598894240824914 0.0103738653308139  
0.0953133368895389 0.3598894240824914 0.5103738606688791  
0.5953133219452549 0.3598894240824914 0.0103738653308139  
0.5953133219816915 0.3598894240824914 0.5103738606688791  
0.1353506028585316 0.0493868881594390 0.0672787257369939  
0.1353506028536431 0.0493868881594390 0.5672787182627521  
0.6353506177663719 0.0493868881594390 0.0672787257369939  
0.6353506177614905 0.0493868881594390 0.5672787182627521  
0.1345233035631974 0.3750678394828624 0.0676335356397494  
0.1345233035883222 0.3750678394828624 0.5676335430923550  
0.6345232886553500 0.3750678394828624 0.0676335356397494  
0.6345232886804748 0.3750678394828624 0.5676335430923550  
0.4016987388374171 0.0448854661101868 0.2168978180185477  
0.4016987387900878 0.0448854661101868 0.7168977882189254  
0.9016987090217294 0.0448854661101868 0.2168978180185477  
0.9016987090447155 0.0448854661101868 0.7168977882189254

0.4021269867966237 0.3693901813731844 0.2171714508060849  
0.4021269867938668 0.3693901813731844 0.7171714805840783  
0.9021269272355565 0.3693901813731844 0.2171714508060849  
0.9021269272328067 0.3693901813731844 0.7171714805840783  
0.2531599287474213 0.0300816212147466 0.2501586761439629  
0.2531599287583992 0.0300816212147466 0.7501586761547773  
0.7531599585631160 0.0300816212147466 0.2501586761439629  
0.7531599585740939 0.0300816212147466 0.7501586761547773  
0.2533485437169682 0.3589955945150718 0.2512325516095550  
0.2533485437159380 0.3589955945150718 0.7512325814308134  
0.7533485437169682 0.3589955945150718 0.2512325516095550  
0.7533485437159380 0.3589955945150718 0.7512325814308134  
0.4827908056425146 0.0111468916289846 0.3291907357054635  
0.4827908056655077 0.0111468916289846 0.8291907059058339  
0.9827908652738970 0.0111468916289846 0.3291907357054635  
0.9827908652968902 0.0111468916289846 0.8291907059058339  
0.4825288849697426 0.3342540645491340 0.3292223306474006  
0.4825288849807205 0.3342540645491340 0.8292223306582222  
0.9825289147854375 0.3342540645491340 0.3292223306474006  
0.9825289147964154 0.3342540645491340 0.8292223306582222  
0.3245947867653991 0.0065306253616755 0.3645496635766152  
0.3245947867060546 0.0065306253616755 0.8645496635874297  
0.8245947867653990 0.0065306253616755 0.3645496635766152  
0.8245947867060545 0.0065306253616755 0.8645496635874297  
0.3244455125258447 0.3309787770695737 0.3646128998676387  
0.3244455124647878 0.3309787770695737 0.8646128998351883  
0.8244455422712170 0.3309787770695737 0.3646128998676387  
0.8244455422804754 0.3309787770695737 0.8646128998351883  
0.3482408306018114 0.2079111191861925 0.0329569771873236  
0.3482408306318744 0.2079111191861925 0.5329569511086003  
0.8482408007861166 0.2079111191861925 0.0329569771873236  
0.8482408008161797 0.2079111191861925 0.5329569511086003  
0.3475382516244048 0.5345766183164548 0.0328918499713437  
0.3475382516265862 0.5345766183164548 0.5328918462179940  
0.8475382218087099 0.5345766183164548 0.0328918499713437  
0.8475382218108983 0.5345766183164548 0.5328918462179940  
0.4970619196027679 0.1968418843113675 0.4991207949037462  
0.4970619196257611 0.1968418843113675 0.9991207651041167  
0.9970618897870801 0.1968418843113675 0.4991207949037462  
0.9970618898100733 0.1968418843113675 0.9991207651041167  
0.4964823006877843 0.5245435161381797 0.4989529216502989  
0.4964823006987551 0.5245435161381797 0.9989529216611204  
0.9964823305034719 0.5245435161381797 0.4989529216502989  
0.9964823305144498 0.5245435161381797 0.9989529216611204  
0.2678016498075558 0.1727182503578149 0.4209196488912283  
0.2678016498305490 0.1727182503578149 0.9209196190916059  
0.7678016498075558 0.1727182503578149 0.4209196488912283  
0.7678016498305490 0.1727182503578149 0.9209196190916059  
0.2675639307830996 0.4995573807983957 0.4206550080983508  
0.2675639307803498 0.4995573807983957 0.9206550378763443  
0.7675638712220395 0.4995573807983957 0.4206550080983508  
0.7675638712192897 0.4995573807983957 0.9206550378763443

0.4258631586092739 0.1705036177175583 0.3853032607605224  
0.4258631585619446 0.1705036177175583 0.8853032309609000  
0.9258631586092738 0.1705036177175583 0.3853032607605224  
0.9258631585619446 0.1705036177175583 0.8853032309609000  
0.4259978041773096 0.4938619022655393 0.3859341840324672  
0.4259978041882875 0.4938619022655393 0.8859341840432816  
0.9259978041773096 0.4938619022655393 0.3859341840324672  
0.9259978041882875 0.4938619022655393 0.8859341840432816  
0.0978583758421729 0.1854823747101627 0.2831354531112660  
0.0978583759097455 0.1854823747101627 0.7831354828892524  
0.5978583684585752 0.1854823747101627 0.2831354531112660  
0.5978583684558183 0.1854823747101627 0.7831354828892524  
0.0984974082132033 0.5091929021350300 0.2827249781777535  
0.0984974082361893 0.5091929021350300 0.7827249483781312  
0.5984973933053558 0.5091929021350300 0.2827249781777535  
0.5984973933283489 0.5091929021350300 0.7827249483781312  
0.2468083723832658 0.1946239026901551 0.2489831058213873  
0.2468083723522222 0.1946239026901551 0.7489831207157912  
0.7468083574754255 0.1946239026901551 0.2489831058213873  
0.7468083574443748 0.1946239026901551 0.7489831207157912  
0.2472429397653456 0.5238890542840553 0.2496448787299334  
0.2472429397180093 0.5238890542840553 0.7496448489303040  
0.7472429844185584 0.5238890542840553 0.2496448787299334  
0.7472429844415516 0.5238890542840553 0.7496448489303040  
0.0179027157594627 0.2199056843828465 0.1708036621781921  
0.0179027157584324 0.2199056843828465 0.6708036919994504  
0.5179026971246553 0.2199056843828465 0.1708036621781921  
0.5179026971236250 0.2199056843828465 0.6708036919994504  
0.0177129500199473 0.5436137744740684 0.1705845775926364  
0.0177129499888966 0.5436137744740684 0.6705845924870403  
0.5177129593021933 0.5436137744740684 0.1705845775926364  
0.5177129593414650 0.5436137744740684 0.6705845924870403  
0.1761680842523294 0.2227218741902936 0.1355905920549406  
0.1761680842933206 0.2227218741902936 0.6355906069926095  
0.6761680395991096 0.2227218741902936 0.1355905920549406  
0.6761680395697784 0.2227218741902936 0.6355906069926095  
0.1760309542686286 0.5479975285646235 0.1353450320439518  
0.1760309542916218 0.5479975285646235 0.6353450022443223  
0.6760309542686287 0.5479975285646235 0.1353450320439518  
0.6760309542916219 0.5479975285646235 0.6353450022443223  
0.1528446010222622 0.0193310643123941 0.4671061556186069  
0.1528446010332401 0.0193310643123941 0.9671061556294285  
0.6528445861144220 0.0193310643123941 0.4671061556186069  
0.6528445861253928 0.0193310643123941 0.9671061556294285  
0.1512724173528555 0.3466126480701865 0.4669937194196273  
0.1512724173038067 0.3466126480701865 0.9669936895767329  
0.6512724321903806 0.3466126480701865 0.4669937194196273  
0.6512724322116542 0.3466126480701865 0.9669936895767329  
0.0037525409787774 0.0294321702862975 0.0008653059716379  
0.0037525409618665 0.0294321702862975 0.5008652981945344  
0.5037525316262089 0.0294321702862975 0.0008653059716379  
0.5037525316092980 0.0294321702862975 0.5008652981945344



0.0024888211639530 0.3571098520502454 0.0010899512180277  
0.0024888211832230 0.3571098520502454 0.5010899762367277  
0.5024888593477309 0.3571098520502454 0.0010899512180277  
0.5024888593670008 0.3571098520502454 0.5010899762367277  
0.2326307618475457 0.0548577574603695 0.0791525535087028  
0.2326307618585235 0.0548577574603695 0.5791525535195243  
0.7326307469396983 0.0548577574603695 0.0791525535087028  
0.7326307469506762 0.0548577574603695 0.5791525535195243  
0.2318042910509490 0.3809930961413594 0.0792130668770595  
0.2318042911039555 0.3809930961413594 0.5792130520042914  
0.7318042762134240 0.3809930961413594 0.0792130668770595  
0.7318042761961081 0.3809930961413594 0.5792130520042914  
0.0743656180709731 0.0597765218945341 0.1140685718725851  
0.0743656180399294 0.0597765218945341 0.6140685867669889  
0.5743655733474380 0.0597765218945341 0.1140685718725851  
0.5743655733163944 0.0597765218945341 0.6140685867669889  
0.0737731175314286 0.3838526317049520 0.1147678435012144  
0.0737731175724198 0.3838526317049520 0.6147678584388833  
0.5737731175314286 0.3838526317049520 0.1147678435012144  
0.5737731175724198 0.3838526317049520 0.6147678584388833  
0.5119545645059904 0.9884907515184297 0.3760185054536514  
0.5119545645169683 0.9884907515184297 0.8760185054644659  
0.0119546231528947 0.9884907515184297 0.3760185054536514  
0.0119546231638725 0.9884907515184297 0.8760185054644659  
0.5113740947132586 0.3114679571037562 0.3761034998438131  
0.5113740947242364 0.3114679571037562 0.8761034998546277  
0.0113740137045868 0.3114679571037562 0.3761034998438131  
0.0113740136452423 0.3114679571037562 0.8761034998546277  
0.5394025030782549 0.0276513365502064 0.2912079199826049  
0.5394025030772175 0.0276513365502064 0.7912079498038633  
0.0394025477314675 0.0276513365502064 0.2912079199826049  
0.0394025477304373 0.0276513365502064 0.7912079498038633  
0.5394205071733874 0.3493859844018137 0.2908738679210041  
0.5394205071843653 0.3493859844018137 0.7908738679318185  
0.0394205817126173 0.3493859844018137 0.2908738679210041  
0.0394205817235951 0.3493859844018137 0.7908738679318185  
0.3504748285234375 0.0209522167211515 0.4147451695251952  
0.3504748285326958 0.0209522167211515 0.9147451694927446  
0.8504748285234375 0.0209522167211515 0.4147451695251952  
0.8504748285326958 0.0209522167211515 0.9147451694927446  
0.3506363908114621 0.3437320143402772 0.4152221827890312  
0.3506363908087052 0.3437320143402772 0.9152222125670175  
0.8506363311800795 0.3437320143402772 0.4152221827890312  
0.8506363312476450 0.3437320143402772 0.9152222125670175  
0.2437501293970399 0.9859128751518054 0.3541853699071455  
0.2437501293960025 0.9859128751518054 0.8541853997284037  
0.7437501443048803 0.9859128751518054 0.3541853699071455  
0.7437501443038500 0.9859128751518054 0.8541853997284037  
0.2430202462624420 0.3112864215363813 0.3539396666403632  
0.2430202462717004 0.3112864215363813 0.8539396666079128  
0.7430202165170697 0.3112864215363813 0.3539396666403632  
0.7430202165263281 0.3112864215363813 0.8539396666079128

0.2389291664032889 0.1499848172656810 0.3740414815257064  
0.2389291664142668 0.1499848172656810 0.8740414815365207  
0.7389291962189766 0.1499848172656810 0.3740414815257064  
0.7389291962299545 0.1499848172656810 0.8740414815365207  
0.2385686881942954 0.4757711681563531 0.3742827791196671  
0.2385686882052733 0.4757711681563531 0.8742827791304817  
0.7385686732864550 0.4757711681563531 0.3742827791196671  
0.7385686732974329 0.4757711681563531 0.8742827791304817  
0.2109302039773810 0.1876313165097585 0.4593917779795187  
0.2109302039180364 0.1876313165097585 0.9593917779903330  
0.7109302337227463 0.1876313165097585 0.4593917779795187  
0.7109302337337242 0.1876313165097585 0.9593917779903330  
0.2106399429850160 0.5169644522101464 0.4581088884042944  
0.2106399429942744 0.5169644522101464 0.9581088883718440  
0.7106399131693284 0.5169644522101464 0.4581088884042944  
0.7106399131785868 0.5169644522101464 0.9581088883718440  
0.3990690185933295 0.1832210077622886 0.3348081972552193  
0.3990690186043074 0.1832210077622886 0.8348081972660408  
0.8990690185933293 0.1832210077622886 0.3348081972552193  
0.8990690186043072 0.1832210077622886 0.8348081972660408  
0.3997956839996736 0.5045706264212150 0.3349301047915980  
0.3997956840226596 0.5045706264212150 0.8349300749919757  
0.8997956839996736 0.5045706264212150 0.3349301047915980  
0.8997956840226596 0.5045706264212150 0.8349300749919757  
0.5078730324254480 0.1516767337077613 0.3957166648315462  
0.5078730323661035 0.1516767337077613 0.8957166648423607  
0.0078731199738840 0.1516767337077613 0.3957166648315462  
0.0078731199145395 0.1516767337077613 0.8957166648423607  
0.5078123901474134 0.4750297807148284 0.3973527281496724  
0.5078123901583913 0.4750297807148284 0.8973527281604938  
0.0078124255887024 0.4750297807148284 0.3973527281496724  
0.0078124255996802 0.4750297807148284 0.8973527281604938  
0.9892847743535612 0.2424390800351256 0.1237607019837698  
0.9892847743786860 0.2424390800351256 0.6237607094363826  
0.4892847743535612 0.2424390800351256 0.1237607019837698  
0.4892847743786859 0.2424390800351256 0.6237607094363826  
0.9887723715847410 0.5660722931403133 0.1236303387753852  
0.9887723715515586 0.5660722931403133 0.6236303164175540  
0.4887723715847410 0.5660722931403133 0.1236303387753852  
0.4887723715515586 0.5660722931403133 0.6236303164175540  
0.9608493645570766 0.2050488814951199 0.2091691611854948  
0.9608493644977392 0.2050488814951199 0.7091691611963092  
0.4608493347413889 0.2050488814951199 0.2091691611854948  
0.4608493347523668 0.2050488814951199 0.7091691611963092  
0.9609177115966085 0.5274611028110295 0.2086081893482148  
0.9609177115775731 0.5274611028110295 0.7086081744321748  
0.4609177115966087 0.5274611028110295 0.2086081893482148  
0.4609177115775733 0.5274611028110295 0.7086081744321748  
0.1499427673447175 0.2100845530241937 0.0849692840989154  
0.1499427673677036 0.2100845530241937 0.5849692542992930  
0.6499427673447176 0.2100845530241937 0.0849692840989154  
0.6499427673677036 0.2100845530241937 0.5849692542992930

0.1502644286826493 0.5337613452705307 0.0850750318373350  
0.1502644287197894 0.5337613452705307 0.5850750094795040  
0.6502644584983370 0.5337613452705307 0.0850750318373350  
0.6502644585354771 0.5337613452705307 0.5850750094795040  
0.2578230565565633 0.2420184361834155 0.1463227541611397  
0.2578230565795565 0.2420184361834155 0.6463227243615101  
0.7578230863722583 0.2420184361834155 0.1463227541611397  
0.7578230863952443 0.2420184361834155 0.6463227243615101  
0.2569586766640051 0.5684291616599546 0.1458815421323595  
0.2569586766749830 0.5684291616599546 0.6458815421431741  
0.7569586468483103 0.5684291616599546 0.1458815421323595  
0.7569586468592882 0.5684291616599546 0.6458815421431741  
0.2613900699099783 0.0787664437747962 0.1255326153224118  
0.2613900698909429 0.0787664437747962 0.6255326004063789  
0.7613900699099784 0.0787664437747962 0.1255326153224118  
0.7613900698909429 0.0787664437747962 0.6255326004063789  
0.2607539825112591 0.4035279929656679 0.1261506229185653  
0.2607539824922236 0.4035279929656679 0.6261506080025253  
0.7607540420723191 0.4035279929656679 0.1261506229185653  
0.7607540421236061 0.4035279929656679 0.6261506080025253  
0.2897286845739659 0.0377618240345985 0.0416437794988793  
0.2897286845407836 0.0377618240345985 0.5416437571410481  
0.7897286845739661 0.0377618240345985 0.0416437794988793  
0.7897286845407837 0.0377618240345985 0.5416437571410481  
0.2886945951845780 0.3660415260808352 0.0407773860810991  
0.2886945951372487 0.3660415260808352 0.5407773562814696  
0.7886945951845780 0.3660415260808352 0.0407773860810991  
0.7886945951372487 0.3660415260808352 0.5407773562814696  
0.1005790145680847 0.0486779399672289 0.1650015641885544  
0.1005790145387535 0.0486779399672289 0.6650015791262233  
0.6005789847523970 0.0486779399672289 0.1650015641885544  
0.6005789847230658 0.0486779399672289 0.6650015791262233  
0.1003486866199354 0.3709813049583744 0.1652653902440322  
0.1003486866009000 0.3709813049583744 0.6652653753279992  
0.6003486717120881 0.3709813049583744 0.1652653902440322  
0.6003486716930526 0.3709813049583744 0.6652653753279992  
0.9925842201733338 0.0786888195691996 0.1027897791783762  
0.9925842201701648 0.0786888195691996 0.6027897717473993  
0.4925842201733339 0.0786888195691996 0.1027897791783762  
0.4925842201701649 0.0786888195691996 0.6027897717473993  
0.9921002996190814 0.4032141422158504 0.1042736543715065  
0.9921002996300593 0.4032141422158504 0.6042736543823208  
0.4921003294347762 0.4032141422158504 0.1042736543715065  
0.4921003294457541 0.4032141422158504 0.6042736543823208

### 3.3. TATB unit cell

1.0

9.2074735902134108 -0.0063117371180602 0.0004979609244119  
-4.6143324124210778 7.9967437309330602 0.0026757353576860  
-0.2187825302030979 -2.6869832341083448 6.6372176643706045  
H C N O

12 12 12 12

## Direct

0.4840524258188916 0.8656187104930450 0.2456814368226092  
0.5159475443738334 0.1343812895878150 0.7543185482556803  
0.2554058384200267 0.7518386725379259 0.2370781197769617  
0.7445941616160620 0.2481613274653633 0.7629218802708081  
0.9683394410738937 0.0616517532164466 0.2633064308891876  
0.0316605850236379 0.9383482616998700 0.7366935393788555  
0.0822198422620079 0.2858352671964248 0.2577150958632777  
0.9177801502345896 0.7141647327062808 0.7422848742455177  
0.6749854403111035 0.5725253548439552 0.2411660359241372  
0.3250145596856775 0.4274746451866128 0.7588339341846587  
0.7883774924843145 0.4620588250284631 0.2537659247620234  
0.2116225074734935 0.5379411452296325 0.7462341050654885  
0.5325657098260963 0.1674195455208862 0.2572571952422169  
0.4674342901273638 0.8325804394687848 0.7427428046463060  
0.3735142896159832 0.0079781913968918 0.2500710337782819  
0.6264857402217385 0.9920218375002562 0.7499289810797348  
0.2177942035036919 0.0109885349217718 0.2496888450841576  
0.7822057965202247 0.9890114623963838 0.7503111549636123  
0.2181631217231541 0.1684645235387216 0.2511925693561637  
0.7818368932372737 0.8315354914245977 0.7488074306916133  
0.3762043582407840 0.3218571692690597 0.2450336100363366  
0.6237956417559978 0.6781428307615082 0.7549663600724592  
0.5346861572283067 0.3237216479275596 0.2500210937604952  
0.4653138426967952 0.6762783520757302 0.7499789062872746  
0.6877444479392975 0.1687693331136406 0.2654683217201210  
0.3122555521367520 0.8312306966818460 0.7345316783276487  
0.3707829640381940 0.8615270425803939 0.2430631628851023  
0.6292170358958958 0.1384729722517668 0.7569368519729144  
0.0622849430508421 0.8568515856113101 0.2482854743142288  
0.9377150382963026 0.1431484142608280 0.7517145405437883  
0.0767910883150775 0.1725140364003689 0.2582560618336155  
0.9232088966933589 0.8274859485423073 0.7417439082751809  
0.3762070316715527 0.4739929869756465 0.2379705942602219  
0.6237929981099085 0.5260070428471257 0.7620293758485739  
0.6789355163739065 0.4654282992973092 0.2479301430909784  
0.3210644835895219 0.5345717006589784 0.7520698271770645  
0.8284753937730256 0.3058851923231869 0.2731592488021482  
0.1715246062231089 0.6941147778879060 0.7268407512456280  
0.6892277364260574 0.0317764400336200 0.2643528523452971  
0.3107722636094838 0.9682235618406210 0.7356471179227455  
0.0571407775714192 0.7163472828210523 0.2429971046500264  
0.9428592224856801 0.2836527171789480 0.7570029102079907  
0.9246593799666484 0.8564631077678622 0.2519515489095049  
0.0753406200694400 0.1435368922354279 0.7480484511382647  
0.2402987530361312 0.4769141112880320 0.2334964776072617  
0.7597012618099559 0.5230859184265958 0.7665035522202427  
0.5129658546678986 0.6121240346045794 0.2374921265374747  
0.4870341453681900 0.3878759653987109 0.7625078735103019

## 3.4. TATB (001) surface

1.0

```
18.4330005646000004 0.0000000000000000 0.0000000000000000
0.0501486149000000 15.9715208487999991 0.0000000000000000
0.0000000000000000 0.0000000000000000 20.1763992310000013
H C N O
96 96 96 96
```

Direct

```
0.0703373324514936 0.3116238571573147 -0.0138296403982404
0.5702209003181729 0.3117373917605104 -0.0137812636313731
0.3202846736817134 0.8116521733155504 -0.0138044199030058
0.8202676249586783 0.8115915751113257 -0.0140267995061097
0.1845558640698134 0.7452437011535660 0.3404945853822176
0.6845578086815078 0.7453300644043677 0.3400406033867735
0.4348525665533523 0.2452698491168761 0.3403918992144253
0.9346725376206076 0.2452358557491051 0.3403628200422801
0.0778356873017545 0.3999027775897674 0.1626471423426443
0.5778469491602308 0.3998538433618020 0.1629988129923534
0.3279008864247066 0.8998602634000459 0.1627560359633815
0.8276179464205861 0.8999134854802768 0.1625995469741369
0.1946253005166131 0.8307558988177806 0.5195000031042687
0.6954921800530965 0.8295919944980905 0.5197974985837598
0.4448117132968167 0.3304014946883733 0.5192055067008108
0.9449359979367138 0.3306261133561840 0.5190998560558598
0.9861332394796510 0.3686726716053431 -0.0218243184453674
0.4860439191873189 0.3687682298015262 -0.0218314209253493
0.2360880551498094 0.8686627649279706 -0.0217758991871318
0.7360786618275281 0.8686701784478252 -0.0218840999319133
0.0999023162417609 0.8026241464760668 0.3377982974973942
0.5999342221474145 0.8026872883091760 0.3372952154576190
0.3501465464920713 0.3025368599340426 0.3378429231969734
0.8500250887854032 0.3026034337660430 0.3377221951975730
0.1625070534050840 0.3427253754477102 0.1663345037038444
0.6625515087049703 0.3426539637467718 0.1664819116148009
0.4125658670583049 0.8426075930583279 0.1663507749301699
0.9123804407758784 0.8428035547292040 0.1660167726836204
0.2788874812243644 0.7737447896806444 0.5266103383652623
0.7799267933172807 0.7726468820229710 0.5264552739416829
0.5291678143728897 0.2733840683302078 0.5260990138439529
0.0291920456666352 0.2735540084965548 0.5263817637186513
0.9862716625239272 0.6659935061048189 -0.0103961254908082
0.4863119899335259 0.6662067922031529 -0.0101704159944491
0.2362718039474254 0.1660521939710455 -0.0102119941594062
0.7362706433880113 0.1659978023383922 -0.0101869409603790
0.1010716110583856 0.0995960932954985 0.3431549208678399
0.6010006743330462 0.0995994344145076 0.3434157234859451
0.3511292838140198 0.5995668469338193 0.3430679410256448
0.8511027127444992 0.5995275767719301 0.3427313563327535
0.1620043834760804 0.0458905927431359 0.1614663337649609
0.6620019060811870 0.0458517256102360 0.1614522541346896
```

0.4119974576384949 0.5458242867315478 0.1615337990022220  
0.9120546893469222 0.5459477425646401 0.1611815748176966  
0.2785048375805242 0.4757551705559717 0.5155332133569683  
0.7791305935401156 0.4748645007224632 0.5146318981424325  
0.5287632720693586 0.9756802685051306 0.5148788181672898  
0.0287263332797636 0.9757597116591562 0.5149082250263451  
0.0702335294763668 0.7222892752711801 -0.0179282945390062  
0.5703019678000382 0.7224090633173128 -0.0178996967743060  
0.3202413764967501 0.2223407268532615 -0.0178549299988203  
0.8203068230618564 0.2222417261651172 -0.0177635459618702  
0.1861641032957835 0.1554434957462929 0.3447432699621183  
0.6860369375815938 0.1554760346008937 0.3452139567615557  
0.4361922761594264 0.6554395789503442 0.3444126558774995  
0.9361830862452948 0.6554410114058206 0.3443228521293866  
0.0770922410129810 0.9898337837298145 0.1597961139596410  
0.5770559537507352 0.9897841177928443 0.1598247866691891  
0.3270499535173164 0.4897954779559029 0.1600052191724826  
0.8271565383682102 0.4898041657429658 0.1596379284753396  
0.1942516335986068 0.4201745679452497 0.5239125846784776  
0.6950978197139920 0.4190265564187254 0.5226150436281611  
0.4446921400971441 0.9197224223623849 0.5229667754031029  
0.9445861884974928 0.9199957411764900 0.5231955875176975  
0.2944925130123184 0.5719631577160614 -0.0141789293153500  
0.7944504069081638 0.5719527442832012 -0.0144271819153690  
0.5444728989413712 0.0719611401839820 -0.0142372921803877  
0.0444966424410083 0.0718335044158502 -0.0142264652846958  
0.4086656344952197 0.0051821195290973 0.3366775679137886  
0.9085383527602645 0.0054301360013586 0.3367195956709111  
0.6588235785769391 0.5052135986952349 0.3366896721163581  
0.1587222173343139 0.5052442980109231 0.3370037984490312  
0.8541424582735841 0.1395721377476641 0.1662677850878198  
0.3541180683049786 0.1396068462146774 0.1663422282019428  
0.1041676052969715 0.6395699407236862 0.1659836435380830  
0.6041827286223784 0.6394602005718573 0.1659450659012287  
0.9707114647061637 0.5701431704964038 0.5184918295206229  
0.4713930901069934 0.5697353875140325 0.5179133493383152  
0.2207816541881514 0.0701728852529440 0.5184068503362117  
0.7207523440534275 0.0703508761186949 0.5186747617663063  
0.2941199929386992 0.4593335763637172 -0.0191951231212478  
0.7940429212155266 0.4593185764861140 -0.0194085595534586  
0.5440612519485289 0.9593187039238537 -0.0192022531969228  
0.0440848279995967 0.9592087058026978 -0.0193272613229153  
0.4083747871615097 0.8921530221460641 0.3380215326208909  
0.9084724444944348 0.8924646514894599 0.3380157044854650  
0.6585831768504750 0.3922511884052648 0.3384738234588868  
0.1585107529506951 0.3922452241814078 0.3384352420176306  
0.8542450073186497 0.2525846847233931 0.1646282320568181  
0.3542473406942033 0.2526321802383620 0.1646591150083166  
0.1042365087660082 0.7525749179732314 0.1642683753836162  
0.6041717132581785 0.7524365817957185 0.1641673599113846  
0.9705794163193872 0.6825277429365872 0.5246458701721598  
0.4714459796693597 0.6821921793058543 0.5241107174281672

0.2209849156696670 0.1826155034122201 0.5249414295179162  
0.7210334440251253 0.1828555362235271 0.5248011788540797  
0.1559580826346804 0.4384409605293967 -0.0146983812107662  
0.6558841878122874 0.4384848204581842 -0.0147625876176926  
0.4059119866926122 0.9384538283654645 -0.0147180369494881  
0.9059287650234029 0.9383592869685472 -0.0148347919028244  
0.2702703585051296 0.8716356427471492 0.3407982794740841  
0.7702678070970426 0.8717236684492908 0.3406767250143800  
0.5204578680851843 0.3716414695974488 0.3410745017829863  
0.0203758193008477 0.3716194712337610 0.3407958177118755  
0.9923517603087283 0.2733685686383751 0.1621123453769881  
0.4923392950405895 0.2733587103182127 0.1622553663692519  
0.2423577793537306 0.7733681737123622 0.1621305194933349  
0.7422344371230986 0.7733535751744794 0.1619789970497513  
0.1089263981183113 0.7040435824254981 0.5206447476572651  
0.6099313063885969 0.7031587556488710 0.5205601298330544  
0.3592090378778230 0.2037664784306934 0.5208439486871971  
0.8592592061363145 0.2038897136561794 0.5204054769459124  
0.0773930624321820 0.4378984418487085 -0.0156754501227698  
0.5773101694089197 0.4380083753706818 -0.0156914678236485  
0.3273563104723645 0.9379461279257234 -0.0156571580471403  
0.8273559638636030 0.9378756871240927 -0.0157416141633620  
0.1915261944215992 0.8714007373369282 0.3397841175621639  
0.6915332972438434 0.8714809969299839 0.3395487165347374  
0.4417261554423735 0.3714271282893366 0.3398754638901292  
0.9416165878153909 0.3713921753070626 0.3397451866676226  
0.0710510769668482 0.2737062928352288 0.1635581200686495  
0.5710468567466730 0.2736915762328004 0.1637352799738982  
0.3210664158821310 0.7736774295563533 0.1635988403875906  
0.8209186276722028 0.7737458652761791 0.1633699696583315  
0.1875695689617952 0.7045268521469179 0.5212100114680014  
0.6885306215048629 0.7034830195892022 0.5211646434298162  
0.4378297221452550 0.2042077886603230 0.5212701558696750  
0.9378587164285221 0.2043701753738507 0.5210192738097867  
0.0388995810140433 0.5170547199865297 -0.0153582875819006  
0.5388610081440228 0.5171659072399825 -0.0153525991907689  
0.2888903782882745 0.0171059886494604 -0.0153095185389742  
0.7888678295568862 0.0170206747228798 -0.0152802220326758  
0.1531982721608002 0.9506616856276464 0.3392231527265432  
0.6531797344199584 0.9507204321854014 0.3390936011267289  
0.4033356614036643 0.4506351076281588 0.3392954369997191  
0.9032644549567024 0.4506409158800881 0.3391821157372067  
0.1095448886714631 0.1946214544520724 0.1648900046596864  
0.6095569608666832 0.1945931241703513 0.1649570505734265  
0.3595664431033441 0.6946055955531570 0.1648734193548620  
0.8594734386721683 0.6946954392200931 0.1644434635066841  
0.2261193811442670 0.6253860173636021 0.5205335191810946  
0.7269380094120983 0.6242059802874866 0.5201041413694140  
0.4763080551196497 0.1250063804284053 0.5204741007120298  
0.9763403913058515 0.1252450171858984 0.5203574464447268  
0.0775013253710854 0.5958527782187515 -0.0149961171930008  
0.5774954463983056 0.5959611491866531 -0.0150290213429900

0.3274932164854676 0.0958970326198582 -0.0149683881107232  
0.8274723497284471 0.0958023024732581 -0.0149202622656256  
0.1921485808832274 0.0293427881090822 0.3407121881636431  
0.6920929338955957 0.0293975777052069 0.3407717032209650  
0.4422310584973612 0.5293248420928713 0.3406629421509848  
0.9421899294423033 0.5293355640090049 0.3405698535262033  
0.0707729888480494 0.1159263191084049 0.1632671251776613  
0.5707735303826627 0.1158871008316578 0.1632883730132642  
0.3207885782193111 0.6159098034215724 0.1633221739140253  
0.8207894607023875 0.6159144446784618 0.1630327348395878  
0.1875542592579765 0.5465451254831903 0.5204683406431105  
0.6881474134712589 0.5454691819247470 0.5199778889585986  
0.4377019929889837 0.0461543666199545 0.5201865415412811  
0.9377455967899432 0.0464162483523859 0.5201351637899719  
0.1561349723994836 0.5946143356396760 -0.0160690890495963  
0.6561286393459390 0.5946781174337948 -0.0161811659077205  
0.4061257124333911 0.0946441062996117 -0.0160770060213793  
0.9061124904981875 0.0945370956118318 -0.0160029275648981  
0.2708333890800719 0.0279976247453221 0.3396187246792836  
0.7707789156541968 0.0280727723510075 0.3396181969258270  
0.5209229163726585 0.5279997432383070 0.3395419627420133  
0.0208970589976949 0.5279758051136382 0.3396133361448656  
0.9920928400846691 0.1170819959478822 0.1638068069388103  
0.4920898908200915 0.1170851997689351 0.1638063052621213  
0.2421073122882802 0.6170830185119094 0.1638694435230079  
0.7421055566704561 0.6170172970535501 0.1637430965248217  
0.1089069067095609 0.5478966792662632 0.5213028042891537  
0.6094927221096027 0.5470247449059179 0.5208475568697869  
0.3590636917920526 0.0476218624887669 0.5212008062886951  
0.8591072461834235 0.0477906871704530 0.5212011474516310  
0.1961186138288200 0.5162573794558030 -0.0157421599105795  
0.6960554513590776 0.5162781675820409 -0.0158769161212132  
0.4460737922664839 0.0162772861710443 -0.0157602043373049  
0.9460940264299997 0.0161751599254833 -0.0157763486535418  
0.3105252186044931 0.9495291340229528 0.3391491081864784  
0.8104957442860996 0.9496208923040217 0.3390723080234774  
0.5606733975173770 0.4495639265880398 0.3392687870075914  
0.0606218824517709 0.4495063761314480 0.3392507416521711  
0.9521712172869252 0.1954416790285065 0.1638092327163656  
0.4521661421837909 0.1954415923317477 0.1638467560145234  
0.2021776496248079 0.6954613810835886 0.1637542518155054  
0.7021663967192692 0.6953796942054890 0.1636667236752568  
0.0689146951378531 0.6262136634503639 0.5211571177965663  
0.5696849913848903 0.6254611915172942 0.5207939227250188  
0.3191319285108988 0.1259843141316621 0.5212557510075254  
0.8191616729430728 0.1261108742153609 0.5211372917008575  
0.1944891199588767 0.3609466239141701 -0.0139407879626143  
0.6943698707387344 0.3609714309428205 -0.0139612231414058  
0.4444356172131839 0.8609630828350995 -0.0139065385392363  
0.9444307426739883 0.8608566231929254 -0.0141826180006095  
0.3086210004893846 0.7943039076292214 0.3428650971075259  
0.8086293977726351 0.7943907440995568 0.3427575798848576



0.5588098551890749 0.2943329490424385 0.3434481754987516  
0.0587461478844611 0.2943086698664770 0.3429026993178044  
0.9538754956652146 0.3506777274572502 0.1600276931686725  
0.4538942658840308 0.3506867934679395 0.1601901978798289  
0.2038978014687516 0.8506721705209469 0.1600801277551555  
0.7037138800314716 0.8506143381499697 0.1599314169069042  
0.0702833813415903 0.7813846496416488 0.5199907012587653  
0.5714762264676115 0.7806666523707239 0.5199808205026835  
0.3205922139153023 0.2811874813817766 0.5203448335553785  
0.8207068050646984 0.2813279154030852 0.5196373273826870  
0.0413782241674063 0.3662064086355454 -0.0170812909138931  
0.5412751804409757 0.3663445417001855 -0.0170577290910035  
0.2913459026279275 0.8662595178346296 -0.0170596240885048  
0.7913188325336769 0.8662043645871839 -0.0171799410491925  
0.1554082526731615 0.7998446886695136 0.3387467509030789  
0.6554391179834889 0.7999297710611475 0.3382655480095199  
0.4056565219645201 0.2998427358342095 0.3387091220742863  
0.9055244980890176 0.2998214949088501 0.3386298214356385  
0.1070268377599233 0.3453635492236877 0.1645509385326711  
0.6070592573131411 0.3453175621980216 0.1647810810140833  
0.3570796606748918 0.8453047922893850 0.1645794576490931  
0.8568764027651694 0.8454142290784709 0.1644692241782387  
0.2235650608879148 0.7761889317849413 0.5226992637748600  
0.7245935643283397 0.7750927958653842 0.5228731637609138  
0.4738268466479061 0.2758563922630070 0.5224590021441478  
0.9738677781671820 0.2760169368705588 0.5224479806508862  
0.9616302374164750 0.5174000618904609 -0.0159545850545799  
0.4615948211570362 0.5175408395288098 -0.0158852468682919  
0.2116165766344541 0.0174432723686293 -0.0158324713094247  
0.7116030445862439 0.0173973941939533 -0.0158001904528734  
0.0759261345718902 0.9512521605854516 0.3382113580489807  
0.5759046506014678 0.9512805788405085 0.3382096393538349  
0.3260726693891341 0.4511289868191838 0.3383848038178932  
0.8260056673617658 0.4512106748120086 0.3382888499494339  
0.1868060169450593 0.1943331612628525 0.1671560032291620  
0.6868187095269495 0.1942586468704585 0.1672227587837569  
0.4368360184191168 0.6942534939306889 0.1671273285177118  
0.9367631625015922 0.6944437504901831 0.1662347027581123  
0.3033736913160147 0.6249915903073185 0.5200710116925391  
0.8041687826029041 0.6236666152525947 0.5195315040705343  
0.5535533095594120 0.1246868987078795 0.5200021889358872  
0.0536052497218263 0.1248593586002575 0.5200660443153586  
0.0415754776986879 0.6677823266608918 -0.0142513659288819  
0.5416146926926032 0.6679225211133305 -0.0141286190521329  
0.2915809249971792 0.1678285322690776 -0.0141205767793189  
0.7915891348930784 0.1677680798635216 -0.0140451594366232  
0.1565740338556788 0.1013477651912876 0.3430918189798983  
0.6564959840784771 0.1013732211132210 0.3433144184958649  
0.4066354401180162 0.6013190951287801 0.3429709800750005  
0.9066078863162136 0.6013441384966877 0.3426841671645700  
0.1065221086421670 0.0440123723420784 0.1612556923383716  
0.6065046997783763 0.0439551822843726 0.1613367638057714

0.3565156837592283 0.5439719259212900 0.1613676577225912  
0.8565601185887602 0.5440297978042664 0.1610821707459479  
0.2232468730858652 0.4744468620810912 0.5197840335727262  
0.7238588941471141 0.4734337531206071 0.5188887381339591  
0.4735039271766012 0.9741117758539275 0.5191835156645908  
0.9734569969963838 0.9743539759332508 0.5191441762230148  
0.1946710008362322 0.6716364554884234 -0.0170572771576518  
0.6946926366857177 0.6716717737939403 -0.0171298741069908  
0.4446725434445154 0.1716514042967344 -0.0170628253914965  
0.9446832467019212 0.1715650373647574 -0.0169956974480019  
0.3096009080110845 0.1048174152979211 0.3399310400068847  
0.8095157231715979 0.1049105190051069 0.3402024664404337  
0.5596496218350586 0.6048642575578368 0.3396946075838373  
0.0596506215791926 0.6048113625699097 0.3399592560910560  
0.9534750433103650 0.0401895142183909 0.1639441618723081  
0.4534356964727488 0.0401864685420611 0.1638906359284268  
0.2034654093003309 0.5401743421156102 0.1640809507324657  
0.7034969668229053 0.5401117203014651 0.1638131973189218  
0.0703586381776589 0.4708232705938413 0.5218934687746503  
0.5707927088264542 0.4700766581438338 0.5211911170659623  
0.3204669089558793 0.9705825788311081 0.5214395605499272  
0.8204942933894963 0.9707470950760666 0.5217566128173917  
0.2680010931833137 0.5158663759619595 -0.0165156070578540  
0.7679387156849807 0.5158646186360206 -0.0167927465164111  
0.5179525075365942 0.0158611939650752 -0.0165859490511041  
0.0179820858660834 0.0157567125878750 -0.0166232181156750  
0.3823387408351108 0.9488625387714625 0.3380629899706840  
0.8823078197779303 0.9490638223239621 0.3380097299904791  
0.6324836024780005 0.4489181547612889 0.3381503493313728  
0.1324352658364960 0.4489119962412029 0.3383952319177272  
0.8803553569266468 0.1959283139971739 0.1646322986516453  
0.3803448402899212 0.1959595368858093 0.1646607139247182  
0.1303684845132052 0.6959429633333025 0.1643866139284338  
0.6303577447411619 0.6958344399148569 0.1642814185885671  
0.9970314212400437 0.6262830567280436 0.5217299143871452  
0.4977715203630321 0.6258300741510846 0.5211503452247946  
0.2472257739038282 0.1262085947444580 0.5218418112609134  
0.7472565914930023 0.1263870117694098 0.5219133216243037  
0.2623239959939392 0.3586973613563093 -0.0225624298764128  
0.7622001981564798 0.3586971149690182 -0.0225996687354661  
0.5122823604173021 0.8586929982891687 -0.0224828406707358  
0.0122770509148729 0.8586039713055927 -0.0227217425396049  
0.3771440596913996 0.7920898783272390 0.3410017037142433  
0.8771503018473925 0.7922095039942814 0.3409166531450087  
0.6273573862580475 0.2921679902447282 0.3423230676129939  
0.1272708701521427 0.2921427243071428 0.3411793859062507  
0.8853412655013653 0.3527674175905413 0.1616000340900954  
0.3853493190962273 0.3528077819957143 0.1615601998289723  
0.1353548589900722 0.8527710229600177 0.1616039463045372  
0.6351818345676324 0.8526595406816965 0.1615322617788251  
0.0024505105471463 0.7834140283623907 0.5286741795448148  
0.5036454028253824 0.7828346394197002 0.5284690826959262

0.2528105392550952 0.2832819754841465 0.5293622454540693  
0.7528881677068556 0.2835018094782723 0.5284097516508233  
0.1615413969018430 0.2926104317533922 -0.0045733636880160  
0.6613833257980299 0.2926785723478078 -0.0044877814035769  
0.4114856124022135 0.7926273507324315 -0.0045174736835833  
0.9114407579088150 0.7925170956210765 -0.0049358369309218  
0.2751271950617960 0.7252264996123835 0.3464783055610562  
0.7751308317939585 0.7253377613928352 0.3463733627588014  
0.5253168893233434 0.2252204638577253 0.3467108220956103  
0.0252508196403512 0.2252195446543931 0.3464016584395174  
0.9872943440794000 0.4198346046415216 0.1566910234396638  
0.4873404906909533 0.4198317508254789 0.1571012778037525  
0.2373489754117581 0.9198049209724168 0.1568665782554671  
0.7371130985592886 0.9197927786525553 0.1566979392918490  
0.1032037499944341 0.8497369086559993 0.5106757444172639  
0.6045112850050820 0.8490059476830945 0.5109348324254284  
0.3534632174065261 0.3495308985651948 0.5108427433894716  
0.8535792390744044 0.3496552433802776 0.5100393794591601  
0.9265204744501095 0.4507898511625144 -0.0261608840671023  
0.4264585253200280 0.4510010102876224 -0.0262317002224820  
0.1764922742037122 0.9508608771684646 -0.0261084428903728  
0.6764626929044748 0.9508181433825843 -0.0260808261898800  
0.0403678473811285 0.8838005010480096 0.3386558822260096  
0.5403676366059388 0.8838057992523262 0.3387176342061924  
0.2905719556792795 0.3836466386293113 0.3391307789384184  
0.7904599567813619 0.3837544309729654 0.3389101787631544  
0.2222055535632877 0.2619022756882280 0.1674980811984890  
0.7222442706273835 0.2618110303327077 0.1676925181546064  
0.4722617861551595 0.7617967877453450 0.1675801168683813  
0.9721445944198188 0.7620333673154764 0.1660782914875187  
0.3386573100867203 0.6916021358708699 0.5297035226095047  
0.8395435539195575 0.6903614223156138 0.5286003440514144  
0.5887709690932210 0.1913671164968822 0.5295742149235613  
0.0888270442183269 0.1914787769375184 0.5298913564365785  
0.9263829609129447 0.5843566665949538 -0.0064126010585423  
0.4264034712902452 0.5845052096970677 -0.0061566366294063  
0.1763956566320856 0.0843855697755347 -0.0061632415079466  
0.6763873459309752 0.0843660941629932 -0.0061734843630602  
0.0408349510153538 0.0194892153129076 0.3366525737642293  
0.5407881232354937 0.0195069343190846 0.3367121761558369  
0.2909379366343072 0.5193429846904922 0.3366622833524732  
0.7909168737571965 0.5194479046718544 0.3366843225529859  
0.2220278233880495 0.1262089920949614 0.1691648240912956  
0.7220466691298678 0.1261151042636106 0.1690974268780768  
0.4720398305368561 0.6261170605901876 0.1690399659080172  
0.9720219314664407 0.6263531588630888 0.1682822888748395  
0.3384090922376913 0.5579948665200851 0.5101066487895501  
0.8392121849141305 0.5565067773535017 0.5100974442720139  
0.5886794738090864 0.0577003191892892 0.5101514055681367  
0.0886880747064241 0.0578716107924454 0.5101233981461625  
0.1619071062702583 0.7403698938172784 -0.0258981495120197  
0.6619869978553589 0.7404305728244976 -0.0259947895518201

0.4119373754044151 0.2403976826186120 -0.0258723573306726  
0.9119449729746930 0.2403358254121215 -0.0257731584211175  
0.2767875473451487 0.1743861012708466 0.3428820719792974  
0.7766669700323947 0.1744431576122966 0.3434558454435833  
0.5267814718027309 0.6744296267526055 0.3421167832082954  
0.0268183631631010 0.6743766944656557 0.3427876795067005  
0.9864688870872281 0.9706674231108182 0.1621532072728540  
0.4863860278229972 0.9706485879897587 0.1620412597527737  
0.2364177273542846 0.4706274268588962 0.1624664995678853  
0.7365021781728993 0.4706037477668550 0.1619766429180080  
0.1027930765340559 0.4022187361752853 0.5321915643786116  
0.6031738846667445 0.4013383874300943 0.5310041196105851  
0.3529513109900315 0.9018963241101747 0.5312565128246626  
0.8529666400633055 0.9021190936227922 0.5318705925675248  
0.2627771979425885 0.6731542363401992 -0.0087840425874237  
0.7627965736997436 0.6731208097333727 -0.0088294639784359  
0.5127842611907888 0.1731420466012708 -0.0088434737565554  
0.0127876070149944 0.1730534449850266 -0.0087814290077555  
0.3782958909099849 0.1058187345837748 0.3376962022993317  
0.8782255324537113 0.1059696473282810 0.3379237841174411  
0.6283621765311800 0.6058732680302881 0.3378387928170098  
0.1283602995572685 0.6058440872954427 0.3378268603288362  
0.8847397726245509 0.0390698740631746 0.1653898952391507  
0.3846977990857607 0.0390924956631881 0.1653966892977681  
0.1347135915855873 0.5390473512779429 0.1654964812244054  
0.6347601051492671 0.5389694284971808 0.1653133188894234  
0.0025569103080143 0.4691086140407375 0.5118025448873613  
0.5029347473668181 0.4686728976152121 0.5113537411503760  
0.2526407891821131 0.9690338099844258 0.5115393411476883  
0.7526736767822393 0.9691624938569715 0.5118374889191663

## References

1. Cady, H.H.; Larson, A.C. The crystal structure of 1,3,5-triamino-2,4,6-trinitrobenzene. *Acta Crystallogr.* **1965**, *18*, 458–496.
